# Supplementary material for: Stearoyl CoA Desaturase Is Essential for Regulation of Endoplasmic Reticulum Homeostasis and Tumor Growth in Glioblastoma Cancer Stem Cells
Source: PubMed Central journal article supplement — Stem Cell Reports. 2019 Mar 28;12(4):712–27. doi: 10.1016/j.stemcr.2019.02.012 (PMC6450460; doi:10.1016/j.stemcr.2019.02.012), 2019-03-28
Supplement: mmc1.pdf [file mmc1.pdf]

**Stem Cell Reports, Volume 12**

**Supplemental Information**

**Stearoyl CoA Desaturase Is Essential for Regulation of Endoplasmic Reticulum Homeostasis and Tumor Growth in Glioblastoma Cancer Stem Cells**

**Kelsey Pinkham, David Jaehyun Park, Arsalan Hashemiaghdam, Aleksandar B. Kirov, Isam Adam, Kamila Rosiak, Cintia C. da Hora, Jian Teng, Pike See Cheah, Litia Carvalho, Gitali Ganguli-Indra, Avalon Kelly, Arup K. Indra, and Christian E. Badr**

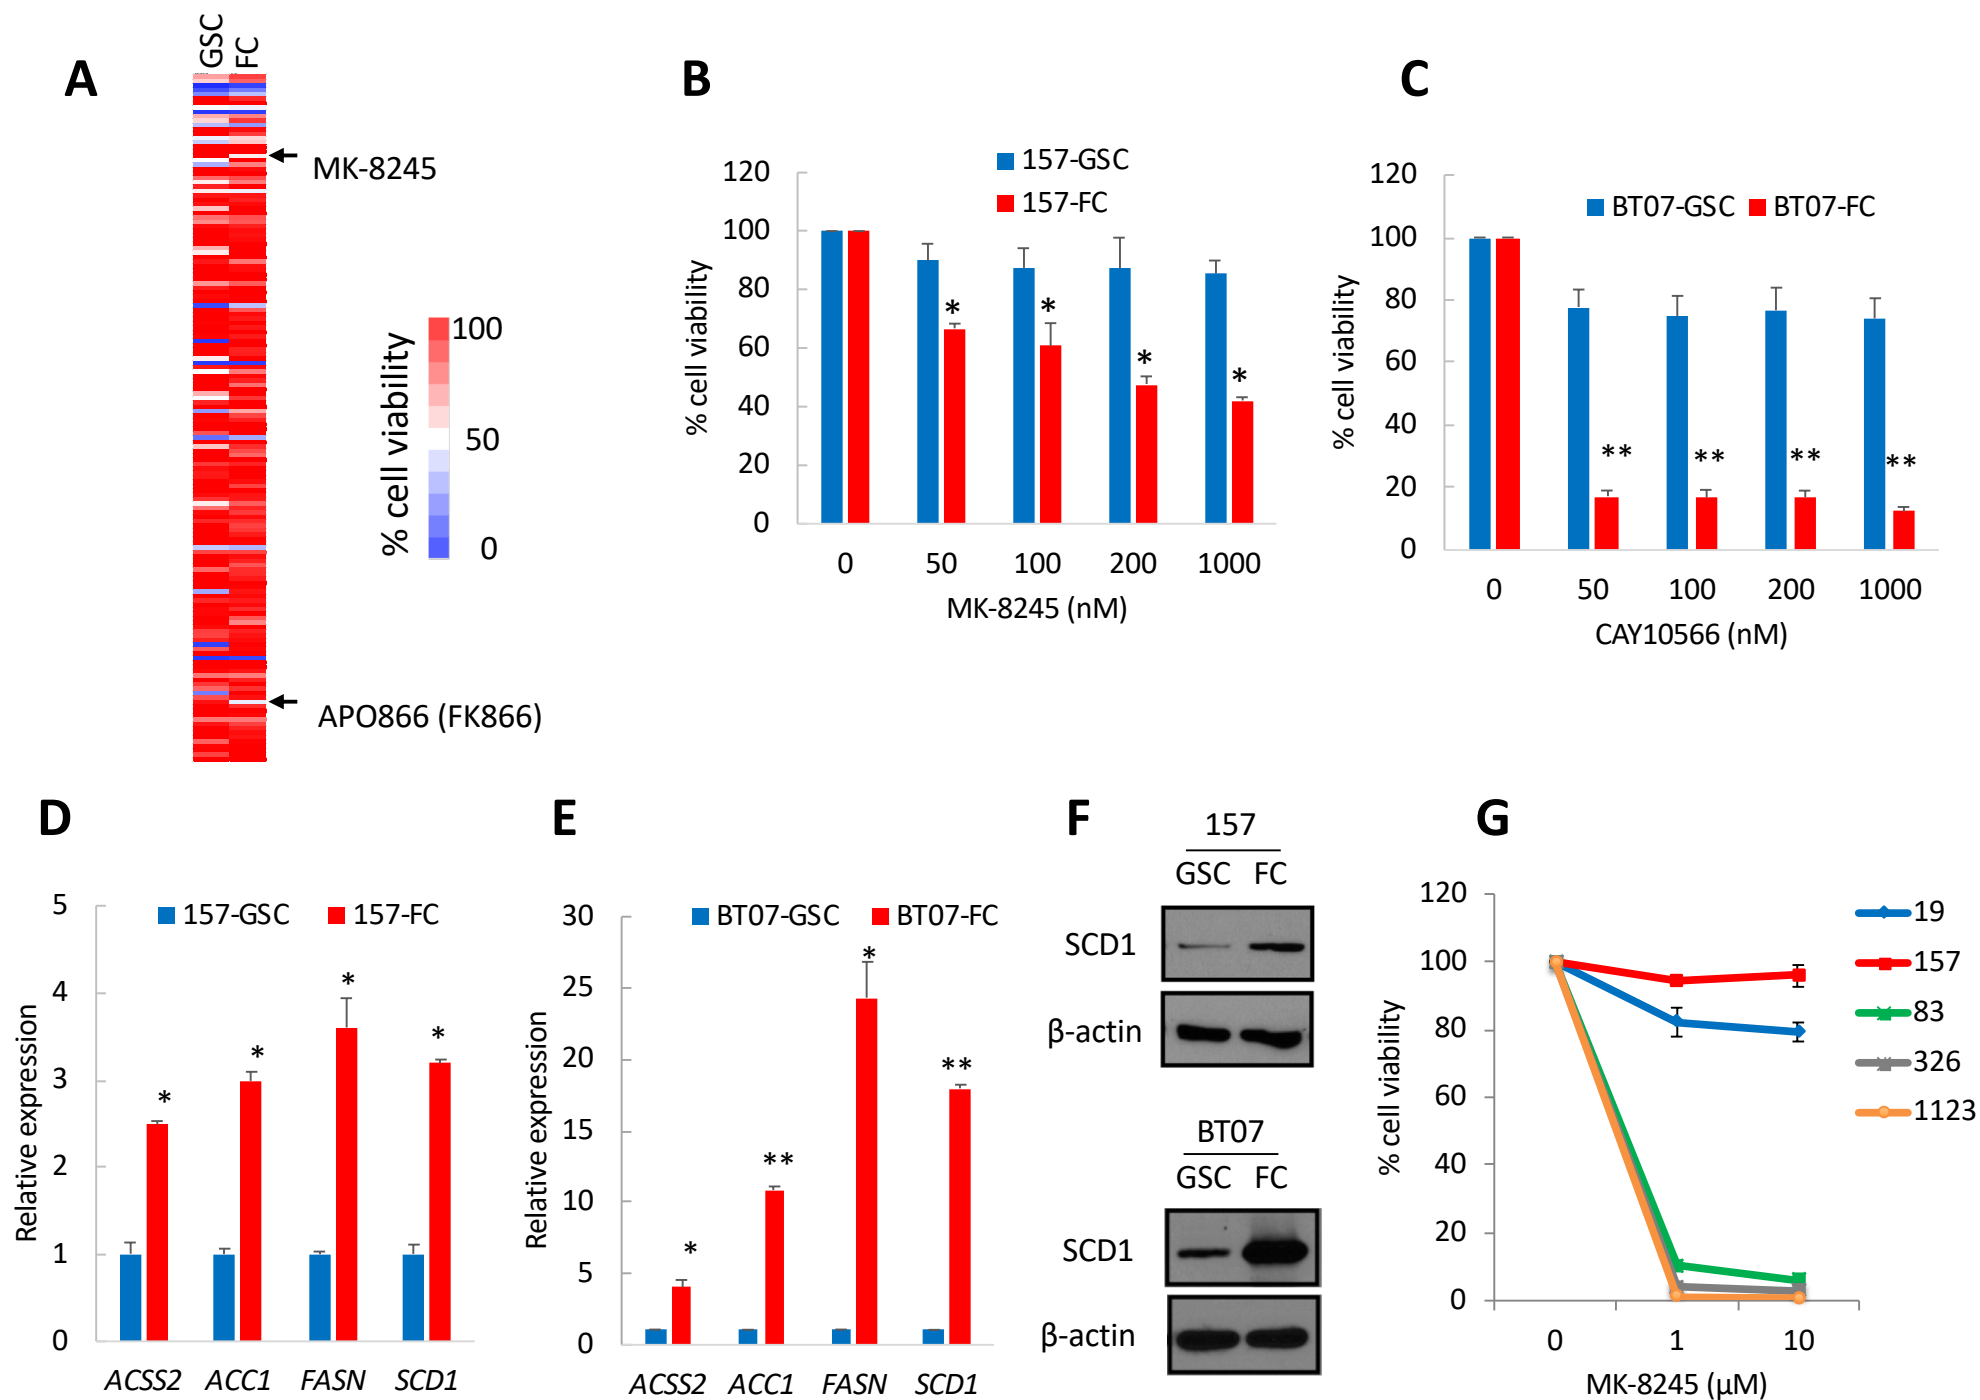

**Figure S1: SCD1 is a therapeutic target in highly proliferative GSC populations.** Related to first paragraph in Results section. **A.** Targeted inhibitors screening in MGG23-GSCs and MGG23-FC. Heat map representing cell viability expressed at % of DMSO treated control, measured after 3 days of treatment. As shown, only two inhibitors for SCD1 (MK-8245) and NAMPT (APO866) resulted in increased cell death in FC compared to the parental GSCs. **B-C.** Two GSCs (157 and BT07) and their matching FC were treated with different doses of the indicated SCD1 inhibitors. Cell viability was measured 5 days after treatment. **D-E.** Relative mRNA expression of the indicated SREBP1 target genes in 157 and BT07 GSCs and their matching FC. **F.** Protein expression of SCD1 in 157 and BT07 GSCs and FC. **G.** Cell viability in proneural GSCs (19;157) and mesenchymal GSCs (83; 326; 1123) treated with MK-8245 for 4 days. \* $p < 0.05$ ; \*\* $p < 0.001$ ; Student t-test.

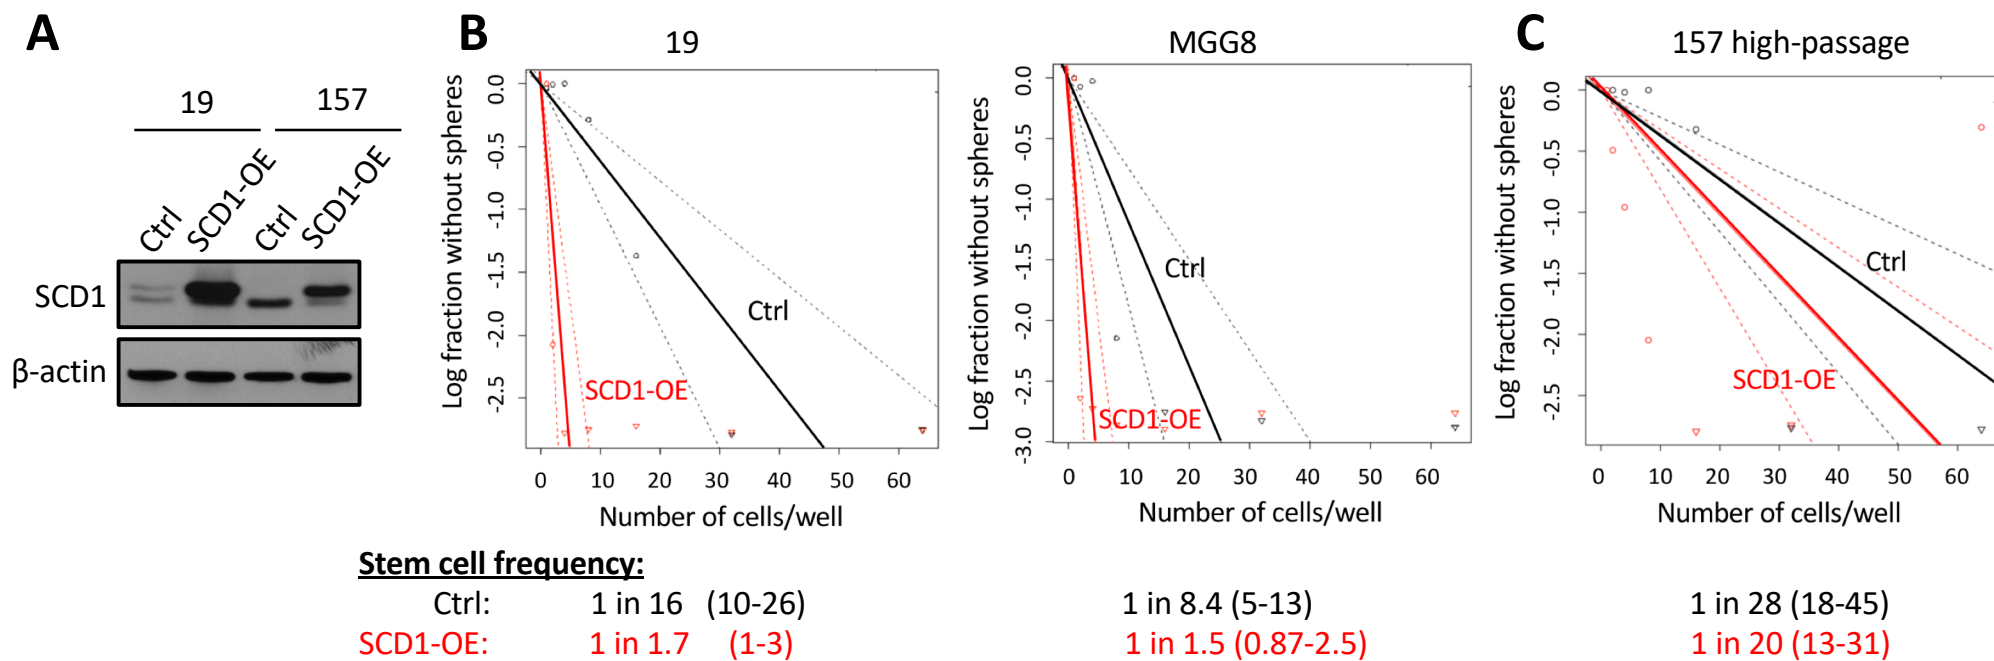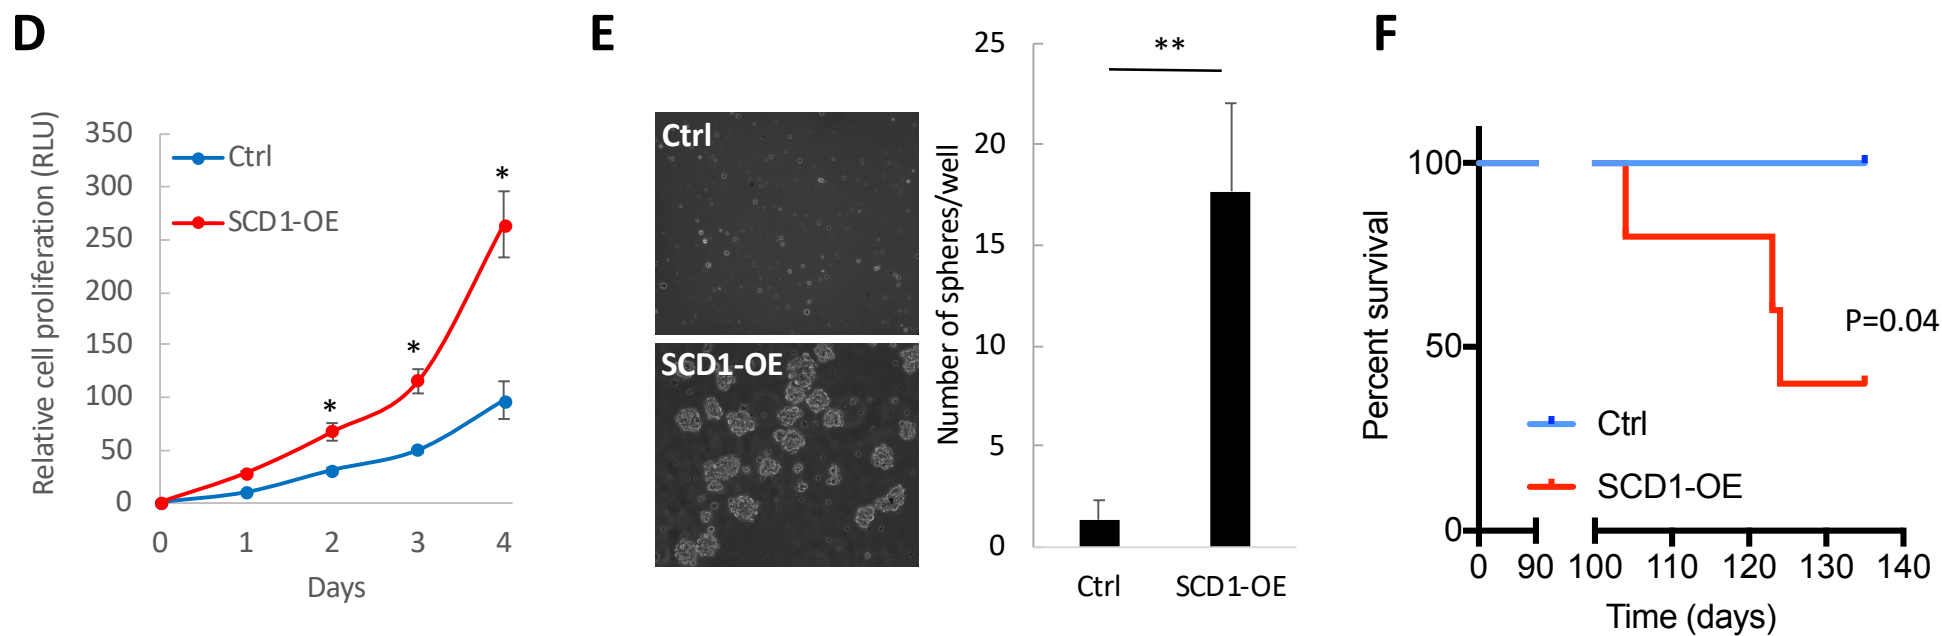

**Figure S2: SCD1 is essential for GSC maintenance and tumor initiation.** Related to Figure 1. **A.** Immunoblot showing upregulated expression of SCD1 after transduction of two GSCs with lentivirus control or SCD1-OE. **B-C** Stem cell frequency in 19 and MGG8 GSCs (A) or high-passage 157 GSCs (B) transduced with control (Ctrl) or SCD1-expressing lentivirus (SCD1-OE) determined using the limited dilution analysis algorithm. **D.** Cell proliferation in high-passage 157 GSCs expressing Ctrl or SCD1-OE. **E.** The same cells were dissociated into single cells and plated at a density of 1 cell/ $\mu$ l. Secondary spheres were counted after 10 days. **F.** High-passage 157-Fluc GSCs ( $5 \times 10^4$ ) expressing a control lentivirus (Ctrl) or SCD1 (SCD1-OE) were implanted in the brain of nude mice (n=5/group). Kaplan-Meier curves showing median survival in both groups. (P values, two-sided log-rank test). \*p<0.05; \*\*p<0.001; Student t-test.

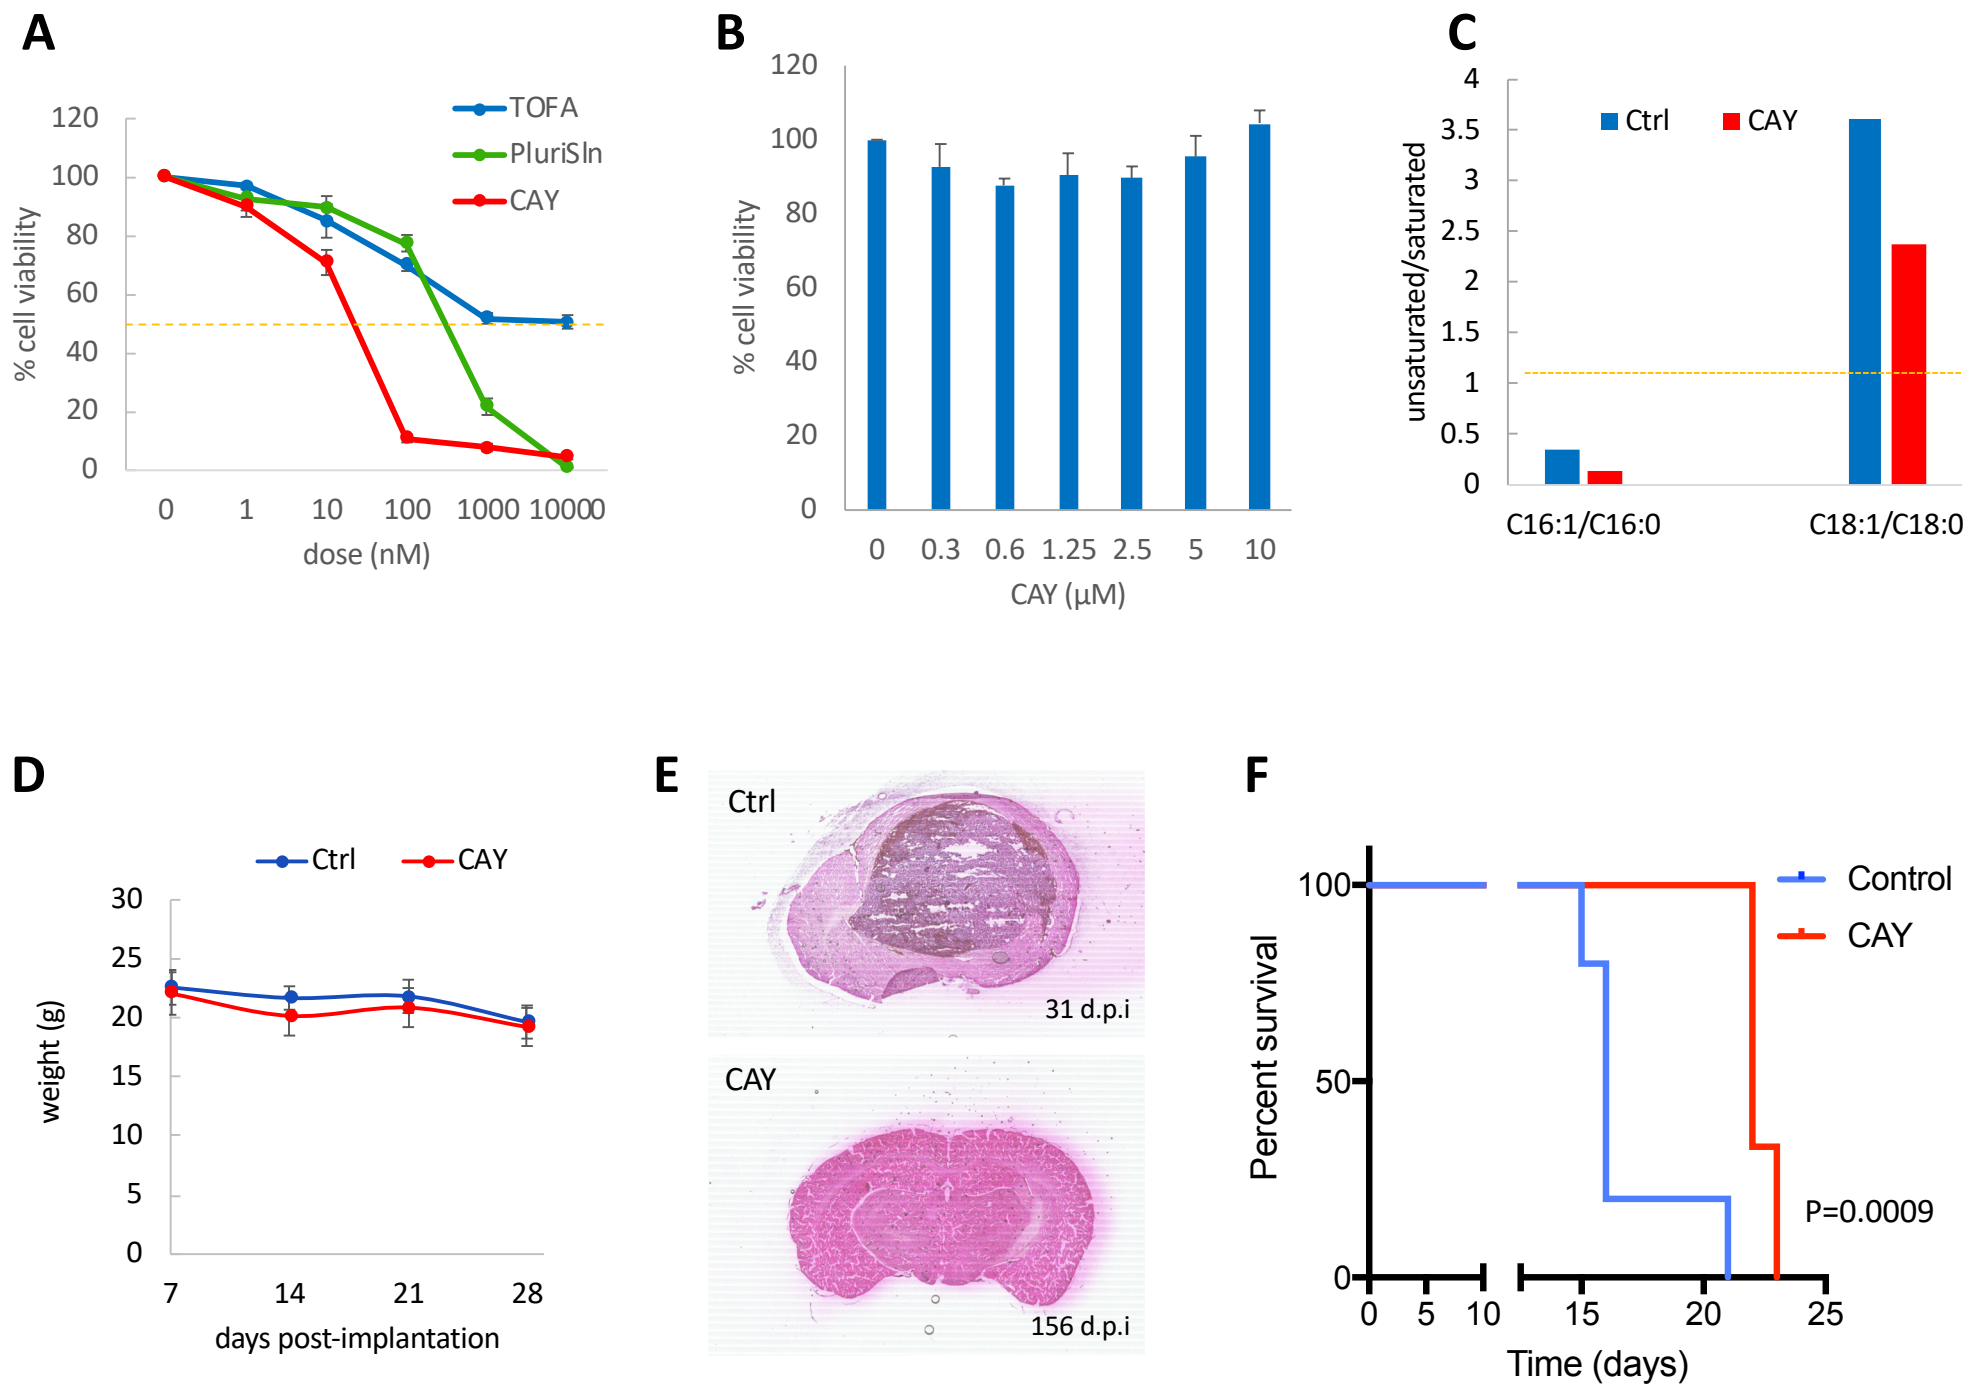

**Figure S3: Pharmacological targeting of SCD1.** Related to Figures 2 and 3. **A.** GSCs were treated with the indicated inhibitors. Cell viability was measured 4 days after treatment. **B.** Cell viability in NHA treated with CAY in serum-free medium at the indicated doses for 4 days. **C.** Ratios of C16:1/C16:0 and C18:1/C18:0 in GSCs treated with CAY (200nM) for 48h. This comparison shows an abundance of C18:1 as compared to C16:1 prior to CAY treatment (since C18:1/C18:0 >1) and depicts a decrease in unsaturated fatty acids (C16:1 and C18:1) after treatment. **D.** Average weight of mice from Control and CAY-treated groups during and post-treatment shows no significant change. **E.** Brains from mice from the control group were isolated at day 25-31 post-implantation (dpi). Similarly brains of the 2 remaining mice from the CAY treated group were isolated at day 156 post-implantation. Brain sections were analyzed by H&E staining. Micrographs from one representative mouse per group are shown. **F.** Mice bearing 83-Fluc tumors (n=5/group) were treated with Ctrl (n=5) or CAY (n=6; 1.5 mg/kg) for 14 days starting at day 6 after implantation. Kaplan-Meier curves showing median survival for Control (16 days) and CAY10566 treated mice (22 days) with P=0.009; two-sided log-rank test. \*p<0.05; Student t-test.

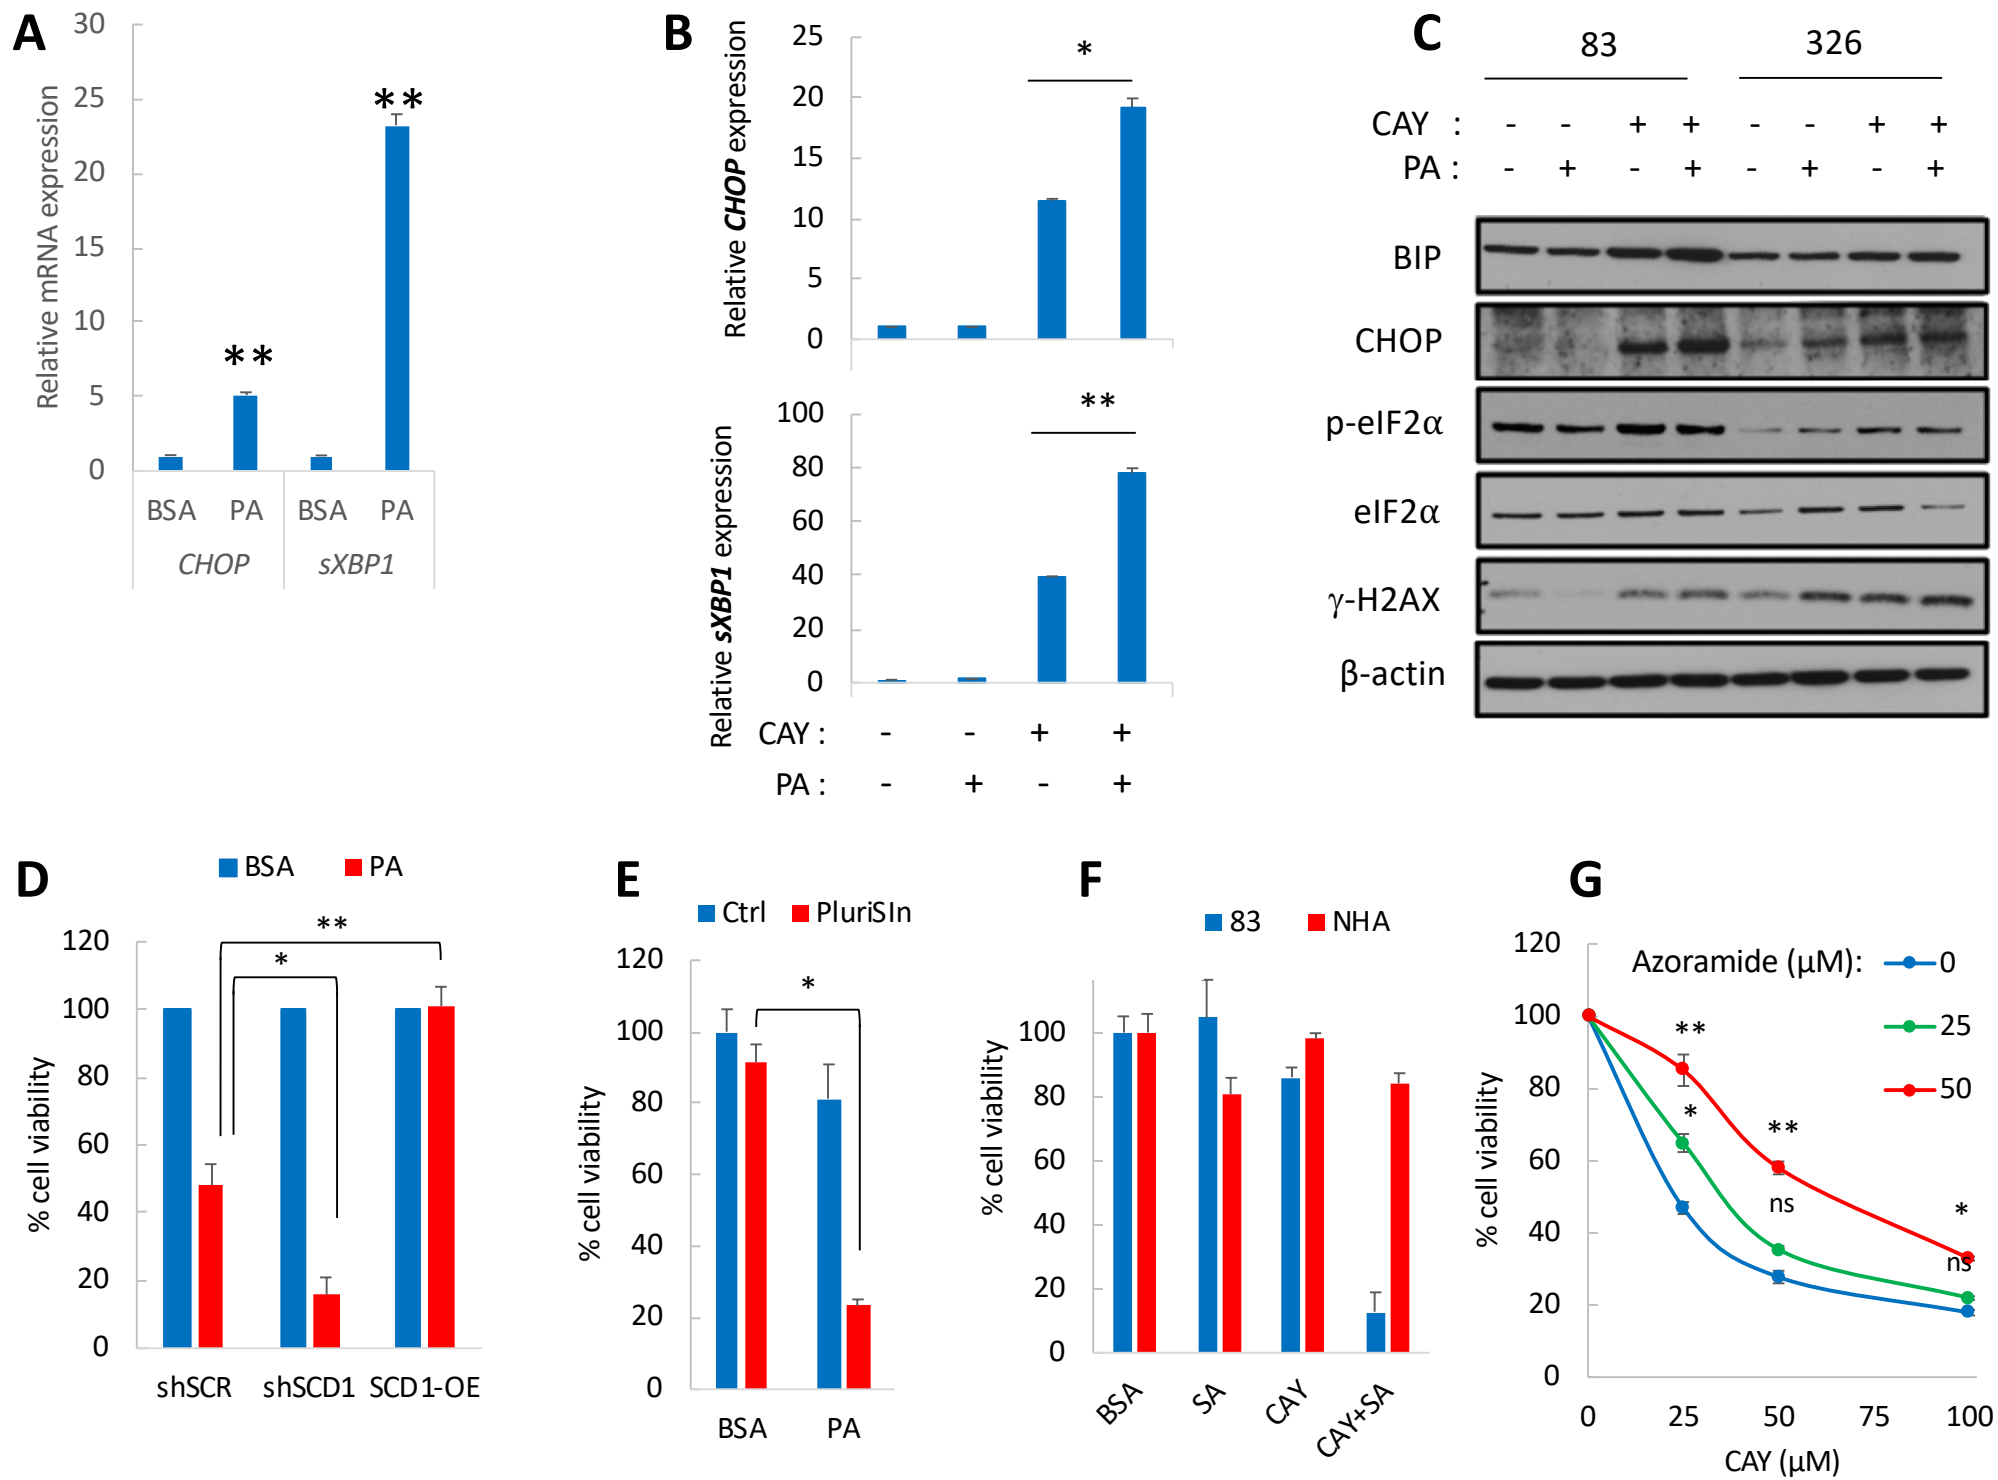



**Figure S4: SCD1 inhibition promotes ER stress.** Related to Figure 4. **A.** Relative mRNA expression of the ER stress markers *CHOP* and *sXBP1* in 83 GSCs treated with PA (400  $\mu$ M) for 24h. **B.** Relative mRNA expression of *CHOP* and *sXBP1* in 83 GSCs treated with CAY (50nM) and PA (50  $\mu$ M) for 24h. **C.** Immunoblot analysis of the indicated ER stress and DNA damage markers in two GSCs treated with CAY (50nM) and PA (50  $\mu$ M) for 24h. **D.** Cell viability in GSCs expressing shSCR, shSCD1 or SCD1-OE and treated with PA (200  $\mu$ M) for 4 days. **E.** Cell viability in GSCs treated with PluriSIn (1  $\mu$ M) in the presence or absence of PA (50  $\mu$ M) for 3 days. **F.** 83 GSCs and NHA co-treated with CAY (10nM for 83 and 1  $\mu$ M for NHA) and Stearic Acid (SA; 200  $\mu$ M). Cell viability was measured after 4 days. **G.** Treatment of GSCs with Azoramide (25-50  $\mu$ M) protects against CAY-induced cell death. \* $p$ <0.05; \*\* $p$ <0.001; ns: not significant; Student t-test.

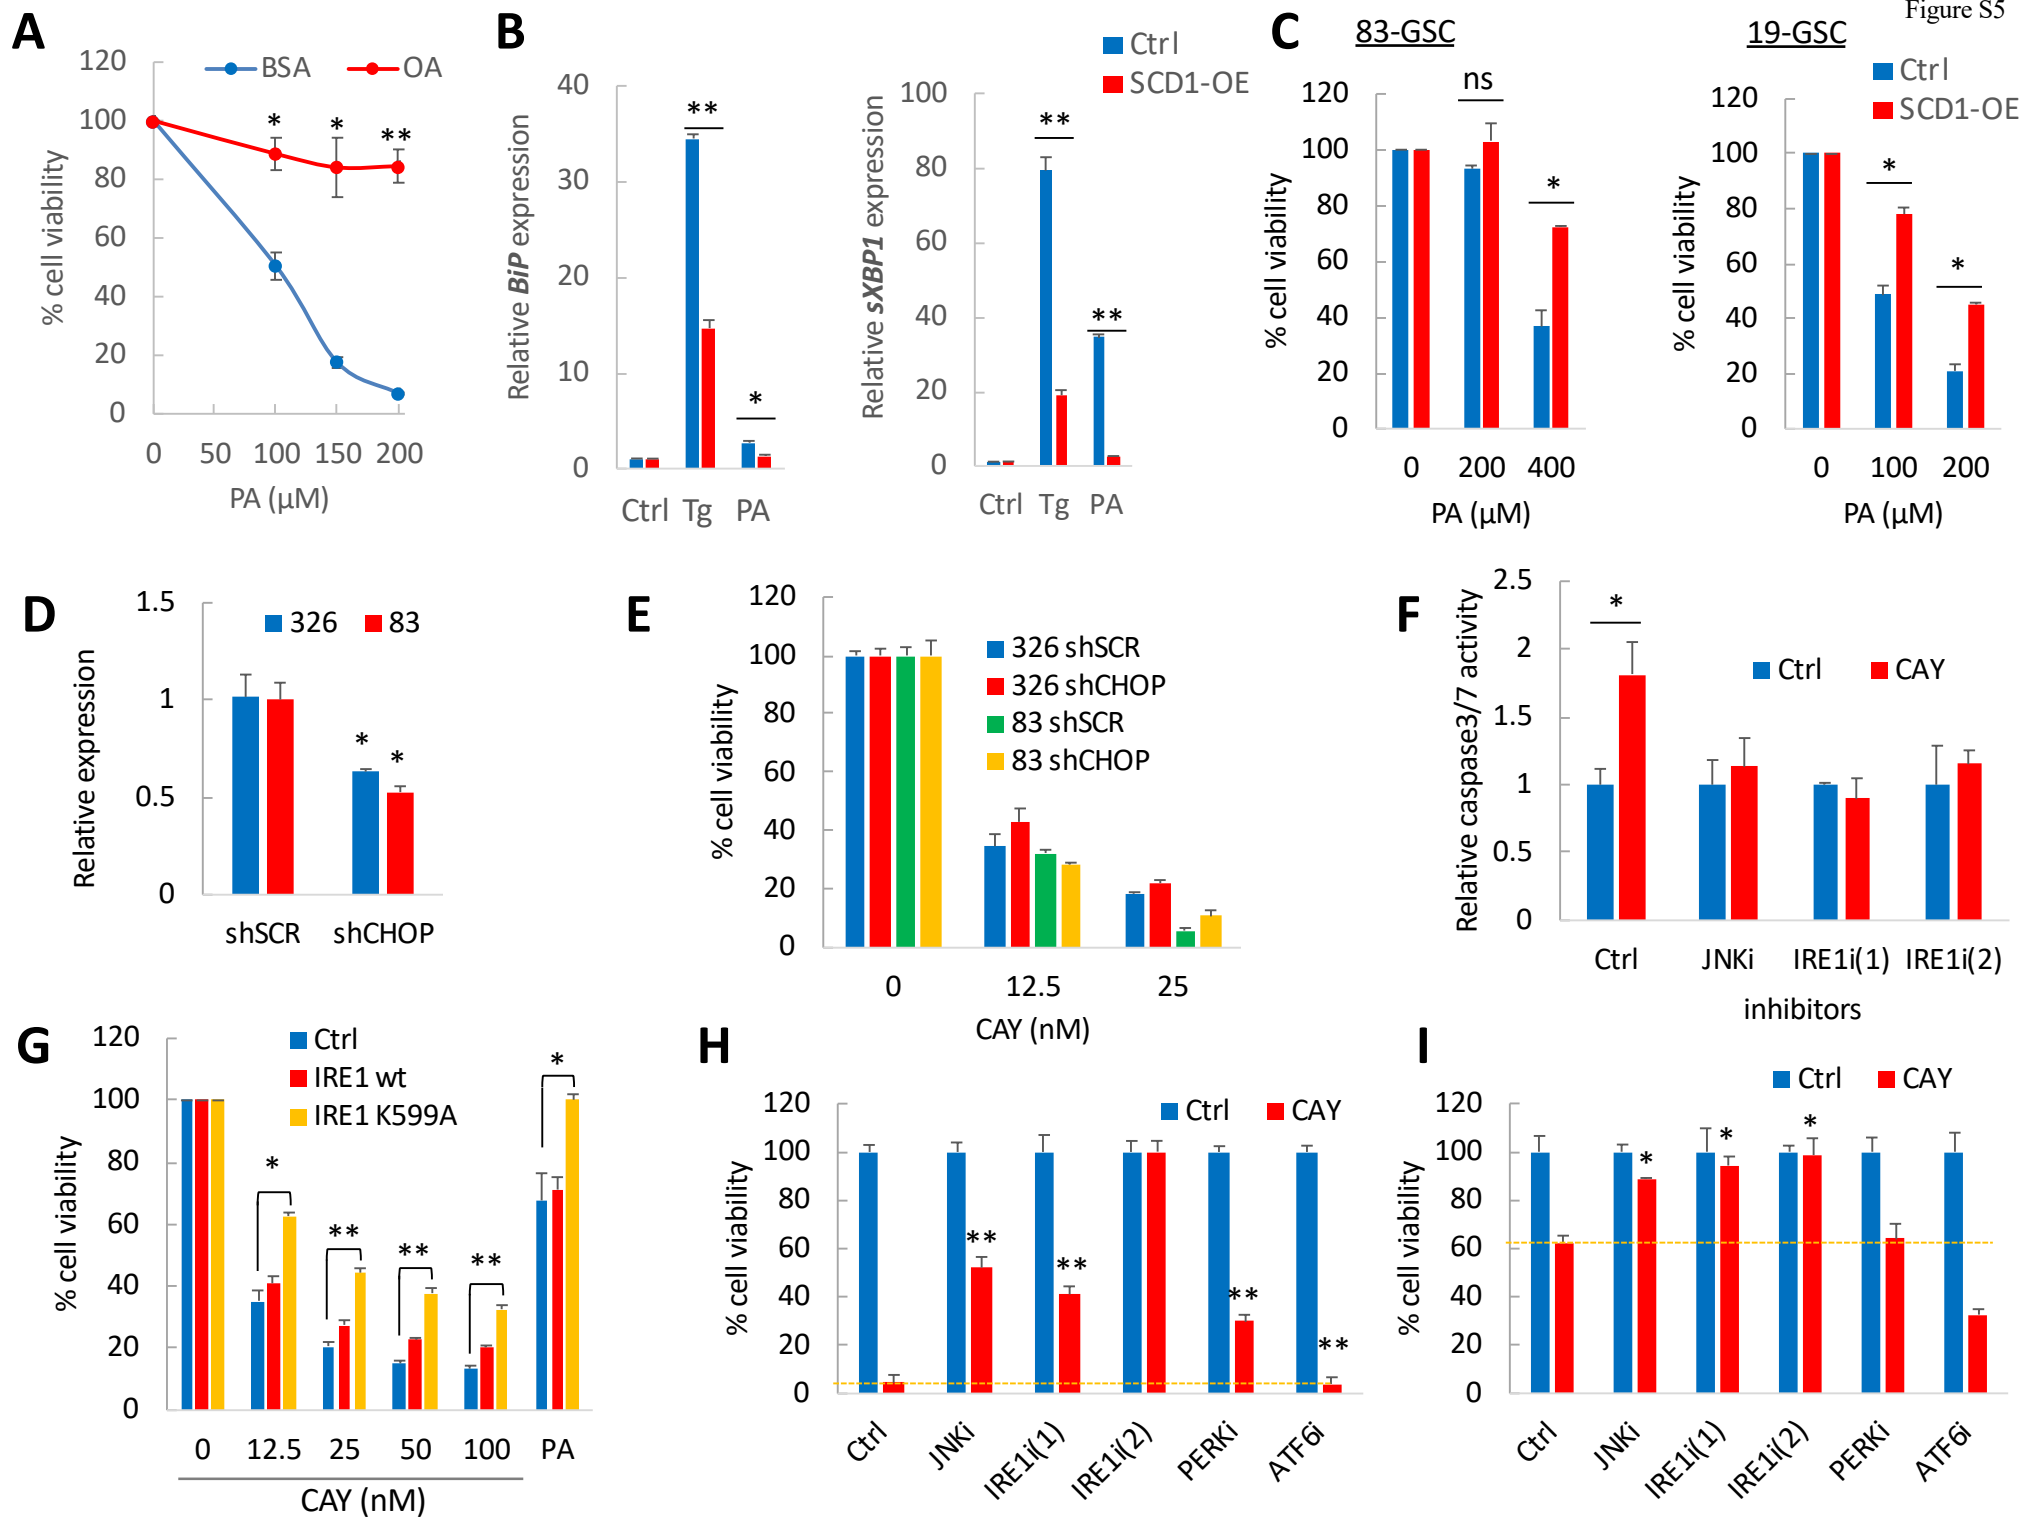

**Figure S5: SCD1-mediated UFA synthesis mitigates ER stress and protects from UPR-induced apoptotic signaling.** Related to Figure 4. **A.** Treatment of GSCs with OA (50  $\mu$ M) protects against PA-induced cell death assessed 4 days after treatment. **B.** Relative mRNA expression of *sXBP1* and *BiP* in GSCs expressing an empty vector (Ctrl) or SCD1 and treated with Thapsigargin (Tg; 300nM) or PA (400  $\mu$ M). **C.** SCD1 overexpression protects against PA-mediated cell death as shown in 2 GSCs specimens. **D.** mRNA expression of CHOP following shRNA mediated knockdown of this gene in 2 GSCs. **E.** Silencing of CHOP fails to alter CAY-mediated cytotoxicity in 2 GSCs as detected by measuring cell viability 4 days after treatment. **F.** Fold change in caspase 3/7 activation after treatment with CAY (50nM) in the presence of JNK inhibitor (SP 600125; 20  $\mu$ M) or IRE1 inhibitors (4 $\mu$ 8C: 25  $\mu$ M and KIRA6: 5  $\mu$ M). **G.** 83 GSCs stably expressing a control vector, IRE1 (wild-type) or mutant IRE1 K599A were treated with CAY or PA (300  $\mu$ M). Cell viability was assessed after 3 days. **H-I.** Cell viability of 83 (H) and L0 (I) GSCs treated with CAY (50nM) or the combination of CAY with: JNK inhibitor (SP 600125; 20  $\mu$ M), IRE1 inhibitors (4 $\mu$ 8C: 25  $\mu$ M and KIRA6: 5  $\mu$ M), PERK inhibitor (GSK2656157; 10  $\mu$ M) and ATF6 inhibitor (Ceapin A7: 20  $\mu$ M) for 4 days. \* $p$ <0.05; \*\* $p$ <0.001; ns: not significant; Student t-test.

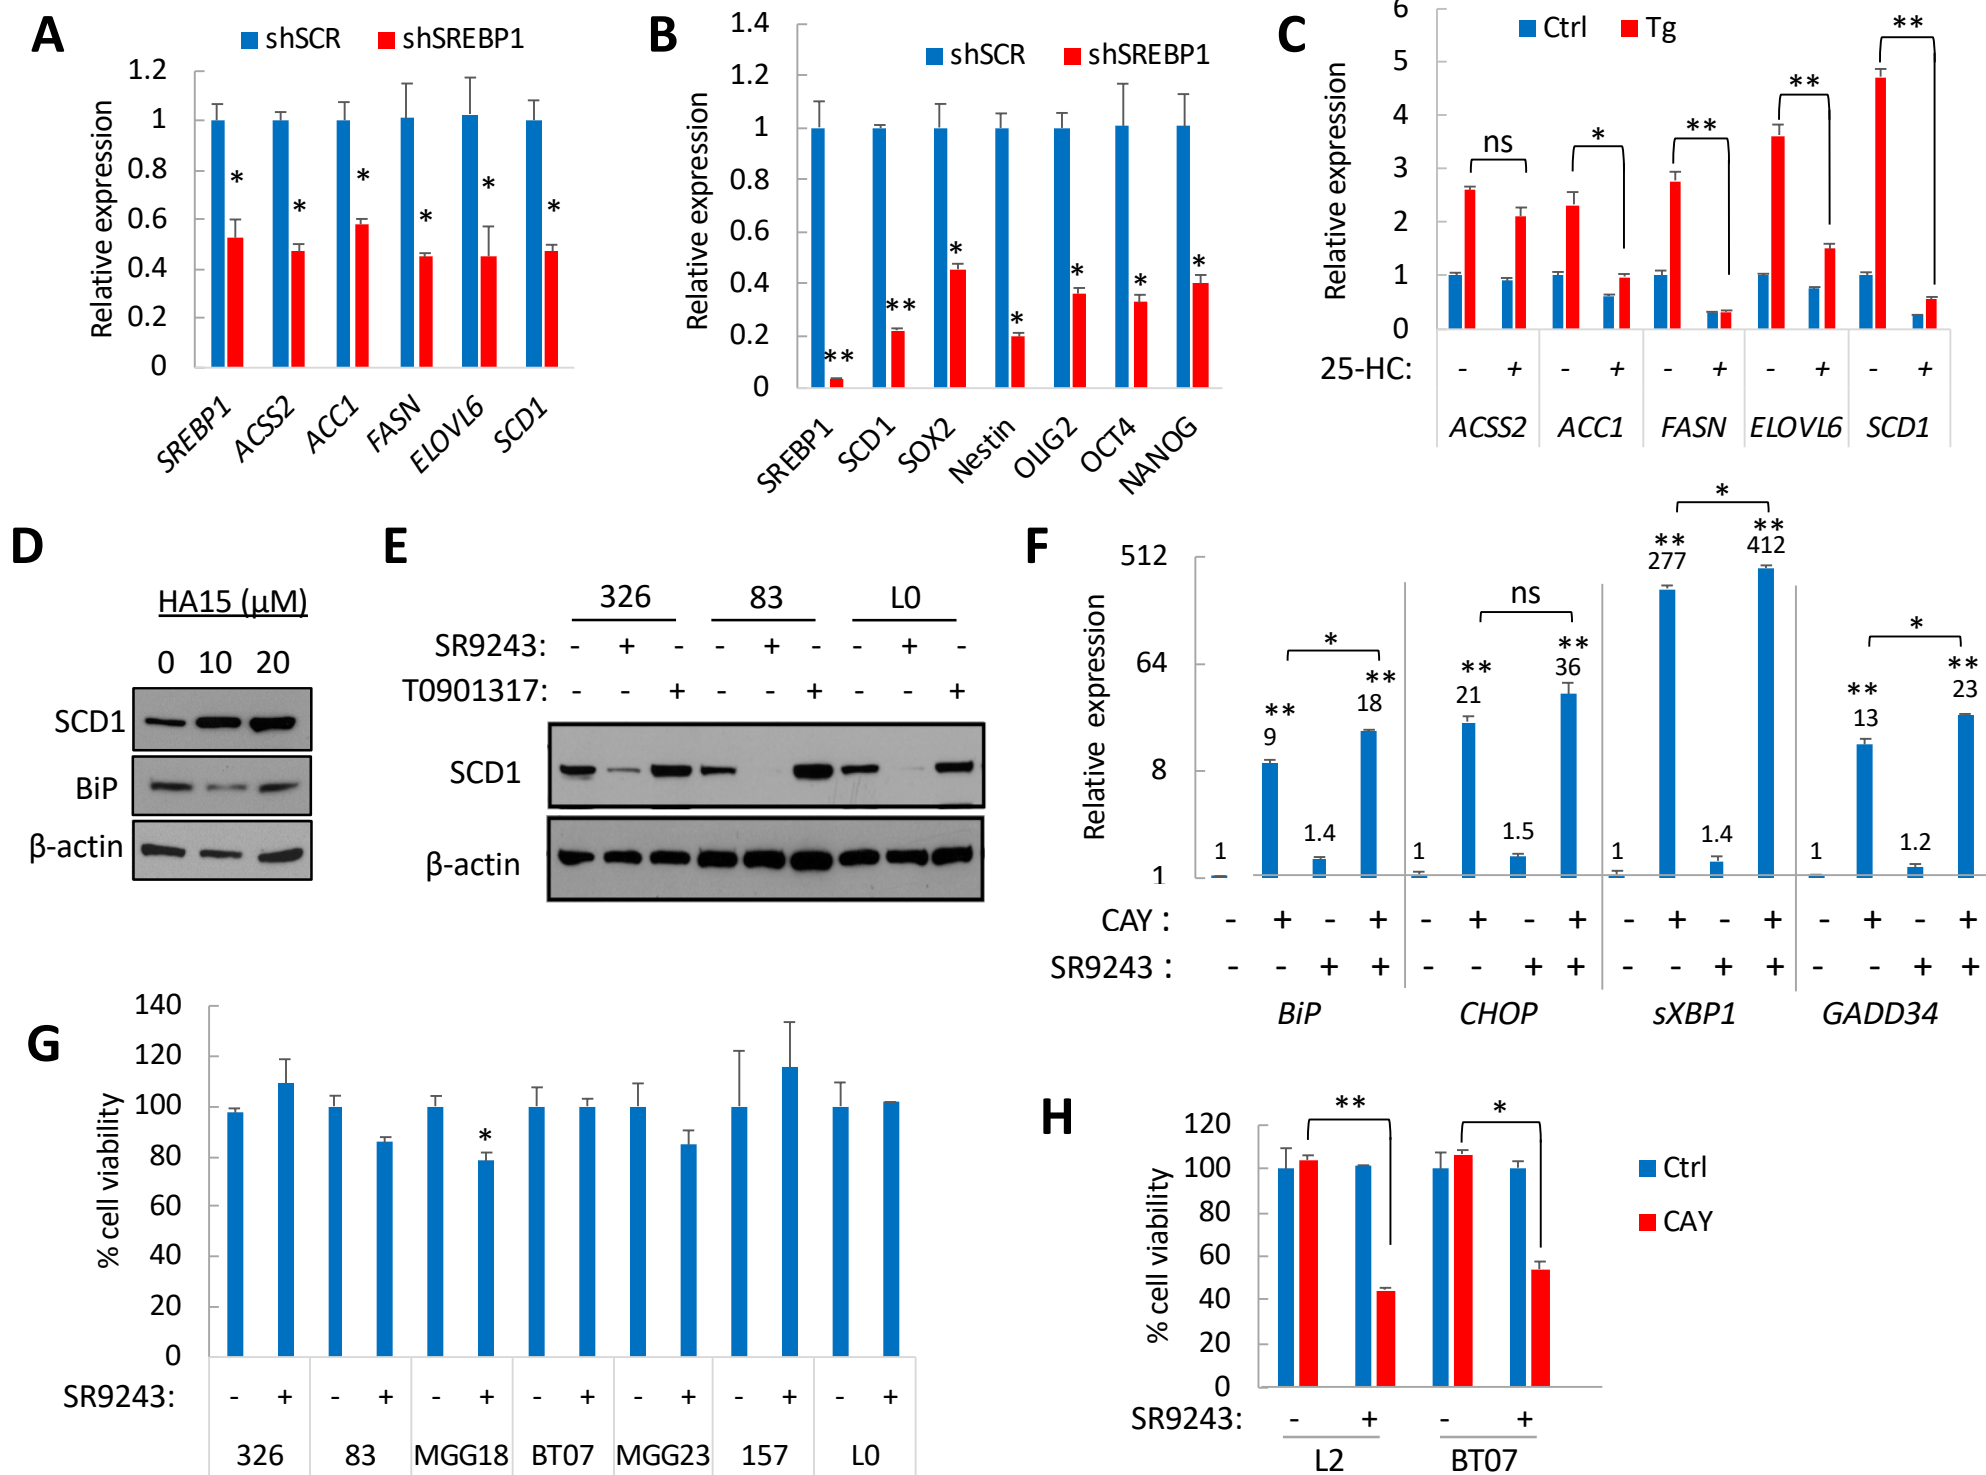

**Figure S6. ER stress promotes SCD1 expression through SREBP1 activation.** Related to Figures 5. **A.** Relative expression of SREBP1 target genes after shRNA-mediated silencing of SREBP1 in 326-GSCs. **B.** Relative expression of SREBP1, SCD1 as well as the stem cell markers *SOX2*, *NESTIN*, *OLIG2*, *OCT4* and *NANOG* in BT07 GSCs expressing shSREBP1. **C.** Relative expression of SREBP1 target genes in GSCs treated with Tg (300nM) in the presence or absence of 25-HC (50  $\mu$ M). **D.** Immunoblot analysis of SCD1 and BiP expression in GSCs treated with HA15 at the indicated doses. **E.** Immunoblot analysis of SCD1 expression in GSCs treated with SR9243 (20  $\mu$ M) or T0901317 (25  $\mu$ M) for 24h. **F.** mRNA expression of ER stress markers following treatment with CAY (100nM) and SR9243 (20  $\mu$ M) for 48h. **G.** Cell viability of the indicated GSCs specimens after treatment with SR9243 (20  $\mu$ M) for 5 days. **H.** Two GSCs were treated with CAY (25nM) and SR9243 (10  $\mu$ M), and cell viability was assessed after 4 days. \* $p$ <0.05; \*\* $p$ <0.001; Student t-test.

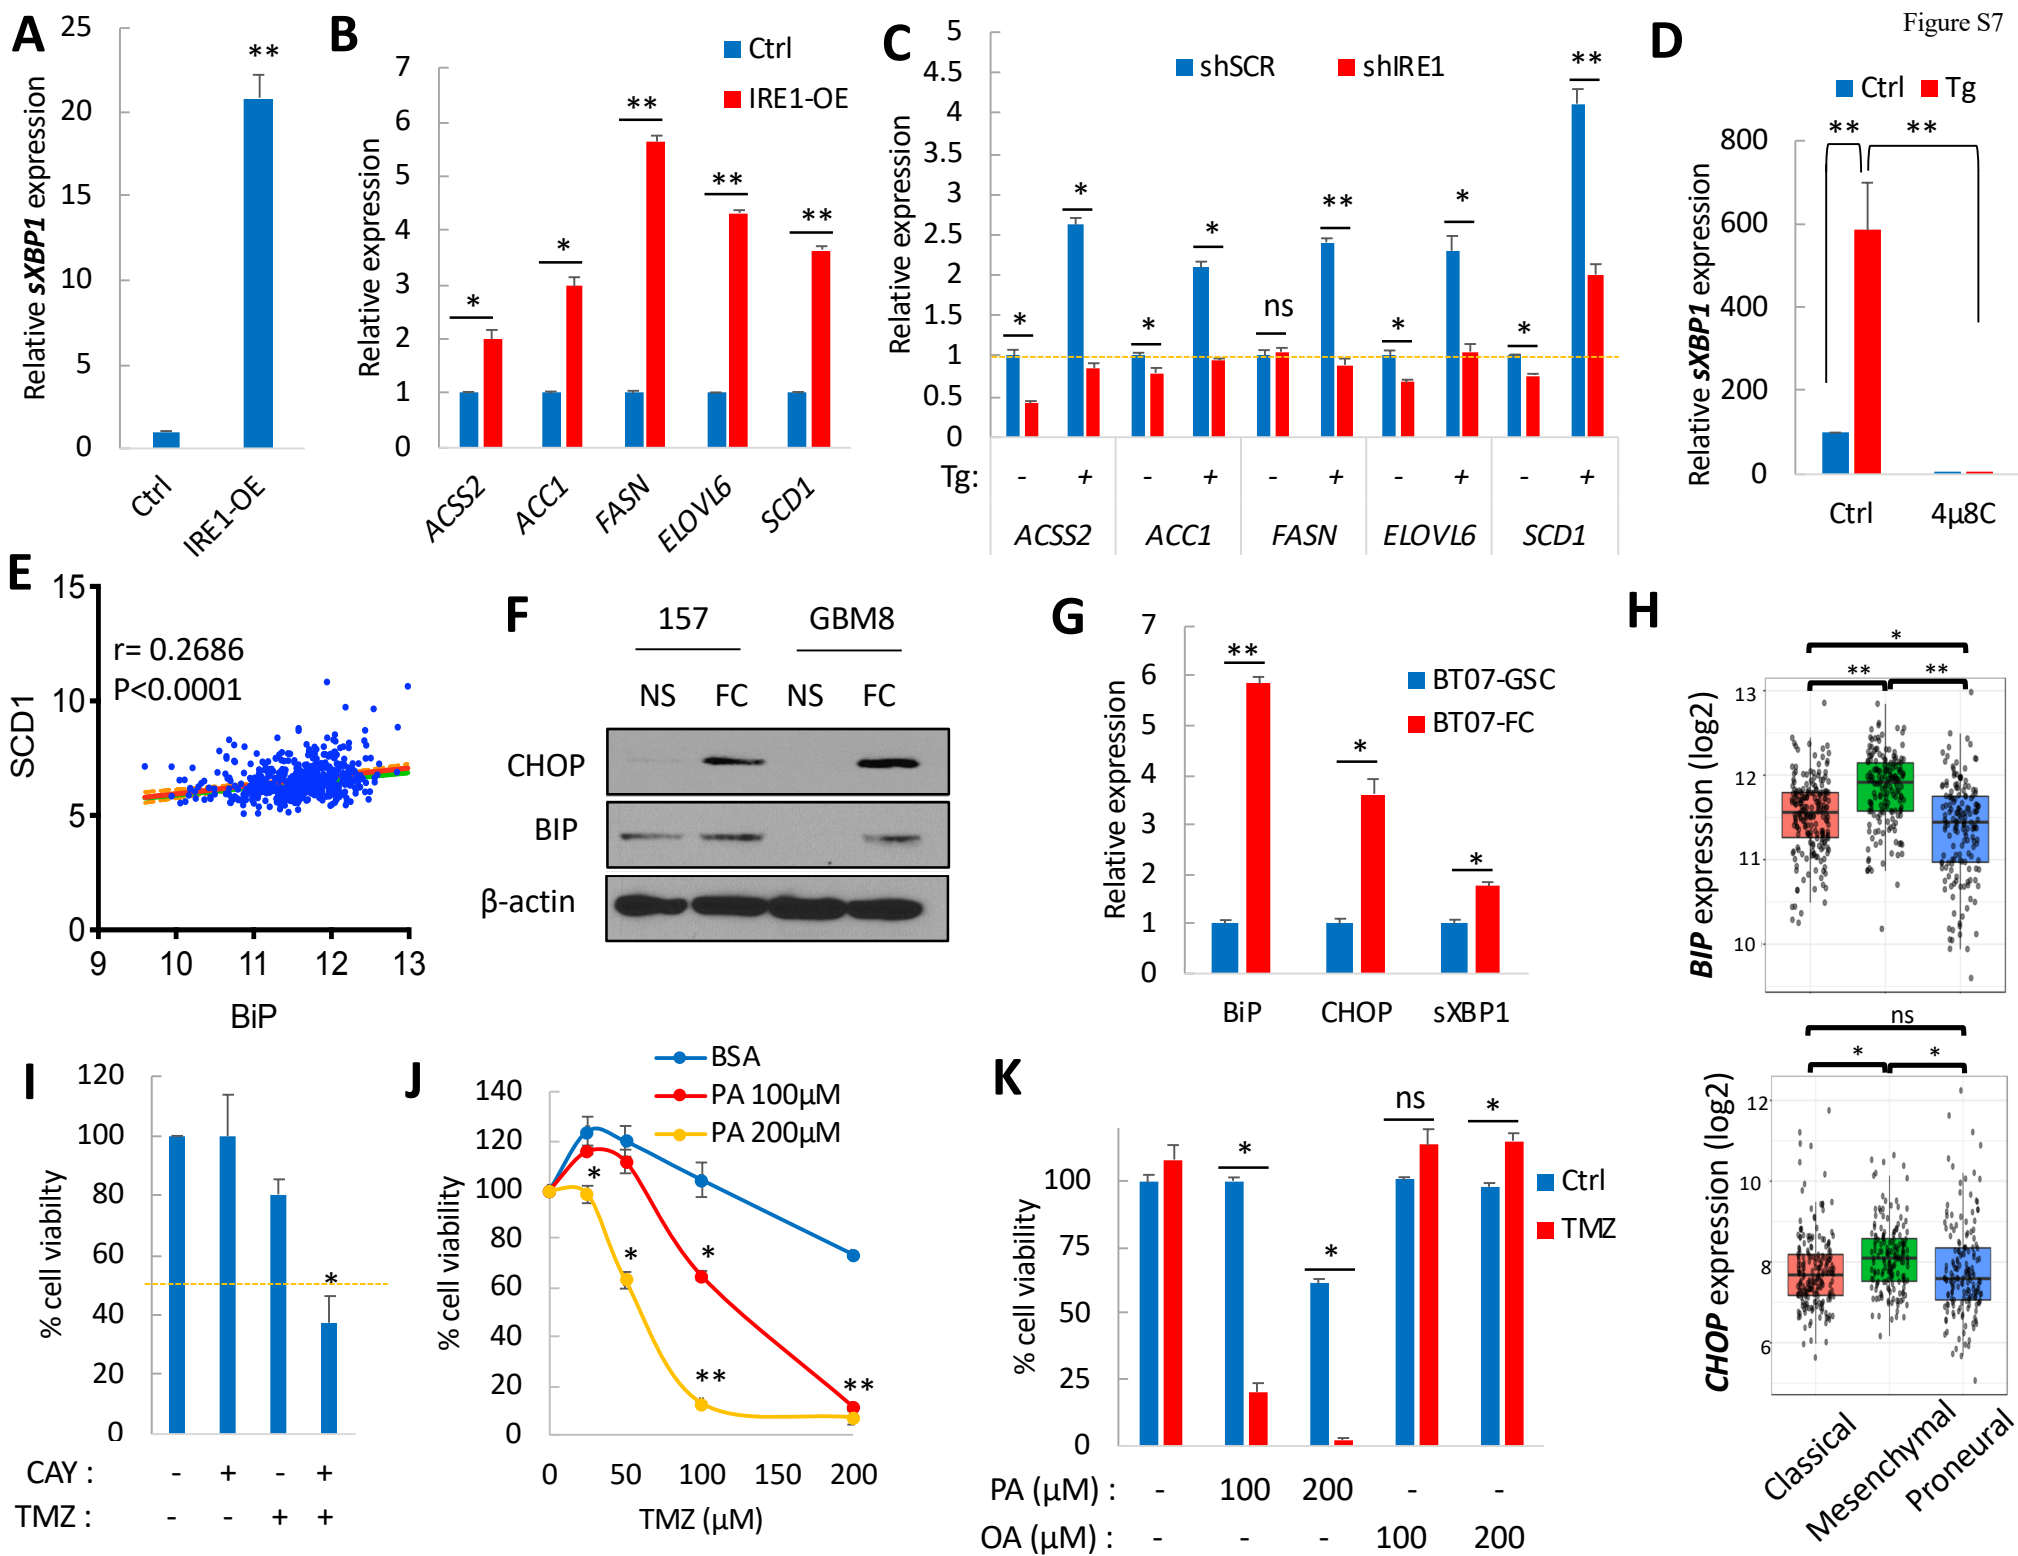

**Figure S7: SCD1 is activated through ER stress-mediated IRE1 signaling and its inhibition sensitizes to TMZ.** Related to Figures 6 and 7. **A.** Relative expression of *sXBP1* after doxycycline-induced expression of IRE1. **B.** Relative expression of SREBP1 target genes after IRE1 expression. **C.** Relative mRNA expression of SREBP1 target genes in GSCs transduced with shSCR or shIRE1 and subsequently treated with Tg (300nM). **D.** Relative expression of *sXBP1* after treatment with Tg (300nM) and the IRE1 inhibitor 4μ8C (25 μM) for 24h. **E.** SCD1 mRNA expression in the TCGA GBM dataset (n= 528 patients; platform: HG-133A) positively correlates with BiP expression. **F.** Immunoblot analysis for BiP and CHOP expression in two GSCs and their matching FC. **G.** mRNA expression of BIP, CHOP and sXBP1 in BT07 GSC and their FC. **H.** mRNA expression of *BiP* and *CHOP* in GBM subtypes from the TCGA dataset and plotted using Gliovis data portal. **I.** Cell viability in TMZ-resistant MGG23 GSCs pretreated with CAY (50 nM) for 24h followed by TMZ (200 μM) for 5 days. **J.** Treatment of L0 GSCs with PA increases the cytotoxicity of TMZ (200 μM). Cell viability was measured 5 days after treatment. **K.** Cell viability of L1 GSCs treated with TMZ (200 μM) in combination with PA or OA at the indicated doses for 4 days. \*p<0.05; \*\*p<0.001; ns: not significant; Student t-test.

## SUPPLEMENTAL EXPERIMENTAL PROCEDURES

### Cell culture

Primary GBM cells used in this study were derived from surgical specimens obtained from GBM patients at the Massachusetts General Hospital (provided by Dr. Hiroaki Wakimoto) under the appropriate Institutional Review Board approval or provided by Dr. Ichiro Nakano (GSCs: 157, 19, 326, 83, 1123) and Dr. Brent Reynolds (GSCs: L0, L1, L2). All specimens used in this study have been previously characterized (see table below) (Wakimoto et al., 2009; Wakimoto et al., 2012) (Mao et al., 2013) (Siebzehnrubl et al., 2013) (Teng et al., 2017). Cells were expanded as neurospheres and maintained in DMEM/F12 medium supplemented with B27 without vitamin A (1:50; Life Technologies), heparin (2 µg/mL; Sigma Aldrich), human recombinant EGF (20 ng/mL; ABM) and human recombinant bFGF-2 (10ng/mL; ABM). ReNcell VM (Millipore) were expanded under similar conditions. Primary human astrocytes were purchased from ScienCell and cultured in complete astrocyte medium (ScienceCell). All cells were maintained at 37°C in humidified 5% CO<sub>2</sub> incubators and regularly tested for potential mycoplasma

| Specimen | diagnosis              | SOX2 | CD44 | EGFR | Subtype | Reference                  |
|----------|------------------------|------|------|------|---------|----------------------------|
| MGG18    | GBM                    |      | +    | ND   | PN      | Wakimoto et al.,2009, 2012 |
| MGG8     | GBM                    | +    | -    | ND   | PN      | Wakimoto et al.,2009, 2012 |
| MGG23    | GBM                    | -    | +    | ND   | M       | Wakimoto et al.,2009, 2012 |
| BT07     | GBM                    | +    | -    | ND   | PN      | Teng et al., 2017          |
| 83       | GBM                    | -    | +    | +    | M       | Mao et al., 2013           |
| 326      | N/A                    | -    | +    | +    | M       | Mao et al., 2013           |
| 1123     | Gr III Oligo,1p19q del | -    | +    | +    | M       | Mao et al., 2013           |
| 157      | GBM                    | +    | -    | -    | PN      | Mao et al., 2013           |
| 19       | GBM                    | +    | -    | -    | PN      | Mao et al., 2013           |
| L0       | GBM                    | +    | -    | +    | M-like  | Siebzehnrubl et al., 2013  |
| L1       | GBM                    | +    | +    | +    | M-like  | Siebzehnrubl et al., 2013  |
| L2       | GBM                    | +    | -    | +    | M-like  | Siebzehnrubl et al., 2013  |

Patient derived GSCs were classified into Proneural (PN), Mesenchymal (M) or Mesenchymal-like based on the predominant expression of PN markers or M markers. The expression profile of SOX2, CD44 and EGFR is indicated as follows: High (+), low (-) or Intermediate (+/-). ND: Not determined.

contamination.

### Floating cells subpopulations

Floating cells (FC) collection and culture was performed as previously described (Teng et al., 2017). In brief, GSCs were cultured as monolayer in the presence of 10% fetal bovine serum (FBS) for 7-10 days. Non-adherent cells (FC) were collected from the supernatant and pelleted by centrifugation. Single FC were then expanded in serum-free stem cell medium.

### Chemical reagents and Antibodies

CAY10566 was purchased from Cayman and Glixs Labs. Ceapin A7 (ATF6i) was provided by Dr. Peter Walter (Gallagher et al., 2016). The following compounds were obtained from Cayman Chemicals: PluriSIn; 4µ8C; KIRA6; GSK2656157; SP 600125; T0901317 and SR9243. MK-8245 and APO866 were obtained from SelleckChem, HA15, 25-Hydroxycholesterol and Thapsigargin from Sigma, Temozolomide from MedChemExpress. All fatty acids were obtained from Cayman and dissolved in DMSO to yield a stock concentration of 500mM- 3M. Fatty acids stocks were



subsequently complexed to fatty acid-free Bovine Serum Albumin (BSA; 2.5mM; Gold Biotechnology) and added to the culture medium.

The following antibodies were purchased from Cell Signaling Technologies: SCD1 (2438); BiP (3177); phospho SAPK/JNK (9255); SAPK/JNK (9252); phospho-eIF2 $\alpha$  (3597);  $\gamma$ -H2AX (9718); Nestin (4760);  $\beta$ -actin (3700); Anti-rabbit IgG, HRP-linked Antibody (7074) and Anti-mouse IgG, HRP-linked Antibody. Rad51 (BSM-51402M) and IRE1 (BS-8680R) were obtained from BLOSS Antibodies, CHOP (sc-7351) from Santa Cruz, SOX2 (ab97959), Nestin (ab22035) and eIF2 $\alpha$  (ab169528) from AbCam.

### **DNA constructs and Lentiviral vectors**

To generate a lentiviral vector expression SCD1, the human SCD1 open reading frame was amplified by PCR (plasmid template obtained from the DNA Resource Core at Harvard Medical School, HMS) and subcloned into a CSCW-IRES-CFP lentivirus backbone thus generating CSCW-SCD1-IRES-CFP. This construct was verified by restriction digestion and sequencing.

CSCW-Fluc-IRES-mCherry lentivirus vector carrying an expression cassette for firefly luciferase (Fluc) and mCherry fluorescent protein was used for in vivo imaging. CSCW-IRES-CFP or pHAGE-CMV-MCS-IRES-ZsGreen (obtained from DNA Resource core, HMS) were used as control lentivirus vectors in all experiments. Doxycycline-inducible IRE1 wild-type (IRE1) or a kinase/endoribonuclease-inactive dominant-negative IRE1 (IRE1-K599A) were a gift from Fumihiko Urano (Addgene plasmids 20744 and 20745(Lipson et al., 2008)). Transcriptional activity was induced by treatment with Doxycycline (10  $\mu$ M; Cayman) for at least 24h.

The following shRNA bacterial glycerol stocks: shSCD1 (TRCN0000327814), shSREBF1 (TRCN0000434619), shCHOP (TRCN0000364393), shIRE1 (TRCN000000529) as well as a non-targeting control shRNA (pLKO.1-puro Non-Target shRNA Control) were obtained from Sigma (MISSION® shRNA Library), amplified and packaged into lentivirus vectors. GSCs were stably transduced with shRNA lentivirus and selected using puromycin (1  $\mu$ g/mL). Knockdown efficiency was determined using immunoblotting and/or qRT-PCR.

### **Mass spectrometry profiling of Fatty acids**

Fatty acids were analyzed as methyl ester derivatives (FAME) using gas chromatography/mass spectrometry (GC/MS) analysis. Sample preparation and fatty acid analysis were performed at the Small Molecule Mass Spectrometry Facility (Harvard University). GSCs were treated with CAY for 48 hours, cells were counted and fixed with methanol then dehydrated using a freeze-dry cycle. For extraction and preparation of fatty acids, samples were resuspended in methanol (500  $\mu$ l) prior to adding the internal standard d27C14 (2mg/mL), hexane (400  $\mu$ l) and acetyl chloride (100  $\mu$ l). Samples were then vortexed, incubated in an ultrasound water bath with glass beads for 10 min followed by a 15 min incubation at 105°C. After an overnight incubation at 4 °C, hexane (500  $\mu$ l) and water (1mL) were added and mixed. The hexane phase was separated by 10 min centrifugation (4000 rpm) and evaporated to dryness under N2 flow. Sample were resuspended in hexanes (100  $\mu$ l) and ran on a Thermo Q exactive GC Orbitrap GC-MS/MS System. A FAME standard (Sigma) was run after all the samples to confirm ID of the FAME detected in the samples.

To determine an approximate comparison of concentrations of different fatty acids, we calculated an estimated normalized response as follows: 1. Since C14 is constant between samples, each area is divided by the area of C14 in the same sample. This should correct for biomass/extraction differences. This is a normalized area. 2. Using the standard reference, we calculated the ratio between normalized area and the known concentration of those fatty acids in the standard. 3. For fatty acids not present in the reference standard, the normalization factors are estimated by taking the factor corresponding to the fatty acid in the standard that is the closest (in number of carbon and unsaturation). 4. Estimated normalized response is calculated for all the fatty acid. This is only an estimation, so small difference in response between fatty acids within a sample are not significant. 5. Difference between samples for each individual fatty acid are not dependent on this estimated response factor and are therefore significant.

### **ELDA assay**

Stem cell frequency was calculated using the extreme limiting dilution analysis (ELDA) algorithm(Hu and Smyth, 2009) (<http://bioinf.wehi.edu.au/software/elda/index.html>). GSCs were dissociated then cells were counted and seeded into a 96-well plate at different cell numbers in 8-replicates. After 7-10 days, neurospheres of > 50  $\mu$ m in diameter were counted. To determine secondary sphere formation, GSCs were dissociated into single cells and plated in eight replicates at a density of 1 cell per  $\mu$ l. Neurospheres were counted after 7-10 days.

### **Quantitative RT-PCR**

Total RNA isolation was performed with RNeasy kit (Qiagen) followed by reverse transcription with OneScript cDNA synthesis Kit (ABM). qPCR reactions were performed using PowerUp SYBR Green Master Mix (Thermo Fisher) in a QuantStudio 3 Real-Time PCR system (AppliedBiosystems). All primer sequences used in this study are listed in

the table below. Oligonucleotides were synthesized by the CCIB DNA Core Facility at the Massachusetts General Hospital. qPCR runs included both human  $\beta$ -actin and HPRT as internal normalization controls.

| GENE               | Forward primer 5'        | Reverse primer 5'       | Source/Reference    |
|--------------------|--------------------------|-------------------------|---------------------|
| <i>SCD1</i>        | TCTAGTCTCTATACCACCACCA   | TCGTCTCCAACCTATCTCCTCC  | MGH primer bank     |
| <i>BiP (GRP78)</i> | CATCACGCCGTCCTATGTCTG    | CGTCAAAGACCCGTGTTCTCG   | MGH primer bank     |
| <i>CHOP</i>        | GGAAACAGAGTGGTCATTCCC    | CTGCTTGAGCCGTTTATTCTC   | MGH primer bank     |
| <i>sXBPI</i>       | GGTCTGCTGAGTCCGCAGCAGG   | GGGCTTGGTATATATGTGG     | Hirota et al., 2006 |
| <i>GADD34</i>      | AGCCACGGAGGATAAAAAGAACA  | CTGAACGATACTCCCAGGACC   | MGH primer bank     |
| <i>IRE1</i>        | CATCCCCATGCCGAAGTTCA     | CTGCTTCTCTCCGGTCAGGA    | MGH primer bank     |
| <i>SREBP1</i>      | ACAGTGACTTCCCTGGCCTAT    | GCATGGACGGGTACATCTTCAA  | MGH primer bank     |
| <i>NAMPT</i>       | CGGCAGAAGCCGAGTTCAA      | GCTTGTGTTGGGTGGATATTGTT | MGH primer bank     |
| <i>FASN</i>        | AAGGACCTGTCTAGGTTTGATGC  | TGGCTTCATAGGTGACTTCCA   | MGH primer bank     |
| <i>ACCI</i>        | GCAGGTCACACGTCTCTTTAT    | CCAGCCTGTCATCCTCAATATC  | This paper          |
| <i>ACSS2</i>       | AAAGGAGCAACTACCAACATCTG  | GCTGAACTGACACACTTGGAC   | MGH primer bank     |
| <i>ELOVL6</i>      | AACGAGCAAAGTTTGAAGTGAAGG | TCGAAGAGCACCGAATATACTGA | MGH primer bank     |
| <i>SOX2</i>        | AACCCCAAGATGCACAATC      | GCTTAGCCTCGTCGATGAAC    | MGH primer bank     |
| <i>NESTIN</i>      | AACAGCGACGGAGGTCTCTA     | TTCTCTGTGCCGCAGACTT     | MGH primer bank     |
| <i>OCT4</i>        | AGTGAGAGGCAACCTGGAGA     | ACACTCGGACCACATCCTTC    | MGH primer bank     |
| <i>NANOG</i>       | TTCCTTCTCCATGGATCTG      | TCTGCTGGAGGCTGAGGTAT    | MGH primer bank     |
| <i>OLIG2</i>       | CTCCTCAAATCGCATCCAGA     | AGAAAAAGGTCATCGGGCTC    | MGH primer bank     |
| <i>ACTB</i>        | CATGTACGTTGCTATCCAGGC    | CTCCTTAATGTCACGCACGAT   | MGH primer bank     |
| <i>HPRT</i>        | CCTGGCGTCGTGATTAGTGAT    | AGACGTTCAAGTCTGTCCATAA  | MGH primer bank     |

#### TCGA analysis

Datasets for mRNA expression and survival of GBM patients were obtained from the TCGA using Gliovis data portal (Bowman et al., 2017). Data plotting and statistical analysis were performed using GraphPad Prism.

#### SUPPLEMENTAL REFERENCES:

- Bowman, R. L., Wang, Q., Carro, A., Verhaak, R. G., and Squatrito, M. (2017). Gliovis data portal for visualization and analysis of brain tumor expression datasets. *Neuro-oncology* *19*, 139-141.
- Gallagher, C. M., Garri, C., Cain, E. L., Ang, K. K., Wilson, C. G., Chen, S., Hearn, B. R., Jaishankar, P., Aranda-Diaz, A., Arkin, M. R., *et al.* (2016). Ceapins are a new class of unfolded protein response inhibitors, selectively targeting the ATF6 $\alpha$  branch. *Elife* *5*.
- Hu, Y., and Smyth, G. K. (2009). ELDA: extreme limiting dilution analysis for comparing depleted and enriched populations in stem cell and other assays. *Journal of immunological methods* *347*, 70-78.
- Lipson, K. L., Ghosh, R., and Urano, F. (2008). The role of IRE1 $\alpha$  in the degradation of insulin mRNA in pancreatic beta-cells. *PloS one* *3*, e1648.
- Mao, P., Joshi, K., Li, J., Kim, S. H., Li, P., Santana-Santos, L., Luthra, S., Chandran, U. R., Benos, P. V., Smith, L., *et al.* (2013). Mesenchymal glioma stem cells are maintained by activated glycolytic metabolism involving aldehyde dehydrogenase 1A3. *Proceedings of the National Academy of Sciences of the United States of America* *110*, 8644-8649.

Siebzehnrubl, F. A., Silver, D. J., Tugertimur, B., Deleyrolle, L. P., Siebzehnrubl, D., Sarkisian, M. R., Devers, K. G., Yachnis, A. T., Kupper, M. D., Neal, D., *et al.* (2013). The ZEB1 pathway links glioblastoma initiation, invasion and chemoresistance. *EMBO Mol Med* 5, 1196-1212.

Teng, J., Carla da Hora, C., Kantar, R. S., Nakano, I., Wakimoto, H., Batchelor, T. T., Chiocca, E. A., Badr, C. E., and Tannous, B. A. (2017). Dissecting inherent intratumor heterogeneity in patient-derived glioblastoma culture models. *Neuro-oncology* 19, 820-832.

Wakimoto, H., Kesari, S., Farrell, C. J., Curry, W. T., Jr., Zaupa, C., Aghi, M., Kuroda, T., Stemmer-Rachamimov, A., Shah, K., Liu, T. C., *et al.* (2009). Human glioblastoma-derived cancer stem cells: establishment of invasive glioma models and treatment with oncolytic herpes simplex virus vectors. *Cancer research* 69, 3472-3481.

Wakimoto, H., Mohapatra, G., Kanai, R., Curry, W. T., Jr., Yip, S., Nitta, M., Patel, A. P., Barnard, Z. R., Stemmer-Rachamimov, A. O., Louis, D. N., *et al.* (2012). Maintenance of primary tumor phenotype and genotype in glioblastoma stem cells. *Neuro-oncology* 14, 132-144.
